# Supplementary material
Source: publisher figshare collection journal article supplement (https://acs.figshare.com/ndownloader/files/4279234)
Supplement: Supplementary file 1 [file 4279234]

Supporting Information of

Precise Isomerization Polymerization of  
Alkenylcyclohexanes. Stereoregular Polymers  
Containing Six-Membered Rings Along the  
Polymer Chain

*Daisuke Takeuchi\**

Chemical Resources Laboratory, Tokyo Institute of Technology, 4259 Nagatsuta,  
Yokohama, 226-8503, Japan

**Experimental Section (S2-S5)**

**Figures (S6-S8)**

## Experimental Section

### General Method

Dry solvents were purchased and used as received. Diimine ligands,<sup>1</sup> PdCl(Me)(diimine)<sup>2</sup>, NiBr<sub>2</sub>(diimine)<sup>2</sup> and NaBARF<sup>3</sup> were prepared according to the reported procedure. Vinylcyclohexane, allylcyclohexane, and MMAO were purchased and used as received. NMR (<sup>1</sup>H and <sup>13</sup>C) spectra were recorded on a Varian Mercury 300 or JEOL JNM-500 spectrometer. The peaks were referenced to CHCl<sub>3</sub> ( $\delta$ 7.26) in the CDCl<sub>3</sub> solvent or C<sub>2</sub>H<sub>2</sub>Cl<sub>4</sub> ( $\delta$ 5.91) in the C<sub>2</sub>D<sub>2</sub>Cl<sub>4</sub> solvent for <sup>1</sup>H and C<sub>2</sub>D<sub>2</sub>Cl<sub>4</sub> ( $\delta$ 74.2) for <sup>13</sup>C. Gel permeation chromatography (GPC) measurement was performed at 152 °C on a TOSOH HPLC-8121GPC/HT equipped with a FT-IR detector, using orthodichlorobenzene as eluent.

### 1. Monomer Synthesis

#### 1) 4-Butenylcyclohexane (I-2)

To a 100-mL two-necked round-bottomed flask containing allyl bromide (6.1 mL, 70.6 mmol) and dry ether (11.3 mL) was added ether solution (22.5 mL) of cyclohexylmagnesium bromide (70.6 mmol), prepared from cyclohexylmethyl bromide (12.5 g, 70.6 mmol) and magnesium (1.76 g), dropwise over a period of 40 min at 0 °C. After the reaction mixture was refluxed for 2 h, 1 M HCl (1.7 mL) and water (20 mL) was slowly added. The organic phase was extracted with ether, washed with water and brine, and was dried over MgSO<sub>4</sub>. Volatile fraction was evaporated and the residue was distilled to afford butenylcyclohexane as colorless liquid (4.06 g, 41.6%, b.p. 176.5 °C). <sup>1</sup>H NMR (300 MHz, CDCl<sub>3</sub>):  $\delta$ 5.82 (m, 1H, H<sub>g</sub>), 4.95 (m, 2H, H<sub>h</sub>), 2.06 (m, 2H, H<sub>f</sub>), 1.69 (m, 5H, H<sub>a</sub>(equatorial), H<sub>b</sub>(equatorial), H<sub>c</sub>(equatorial)), 1.26 (m, 6H, H<sub>a</sub>(axial), H<sub>b</sub>(axial), H<sub>d</sub>, H<sub>e</sub>), 0.09 (m, 2H, H<sub>c</sub>(axial)).

5-Pentenylcyclohexane (I-3) and 11-undecenylcyclohexane (I-9) were synthesized similarly by the reaction of cyclohexylmagnesium bromide and 5-

bromopentene and 11-bromoundecene, respectively.

5-Pentenylcyclohexane (**I-3**):  $^1\text{H}$  NMR (300 MHz,  $\text{CDCl}_3$ ):  $\delta$  5.81 (m, 1H,  $\text{H}_\text{h}$ ), 4.95 (m, 2H,  $\text{H}_\text{i}$ ), 2.04 (m, 2H,  $\text{H}_\text{g}$ ), 1.68 and 1.5-0.8 (m, 17H,  $\text{H}_\text{a}$  -  $\text{H}_\text{f}$ ).

11-Undecenylcyclohexane (**I-9**):  $^1\text{H}$  NMR (300 MHz,  $\text{CDCl}_3$ ):  $\delta$  5.81 (m, 1H,  $\text{H}_\text{o}$ ), 4.95 (m, 2H,  $\text{H}_\text{n}$ ), 2.04 (m, 2H,  $\text{H}_\text{m}$ ), 1.67 and 1.5-0.8 (m, 27H,  $\text{H}_\text{a}$  -  $\text{H}_\text{l}$ ).

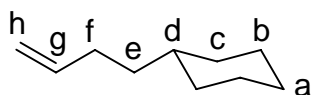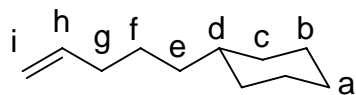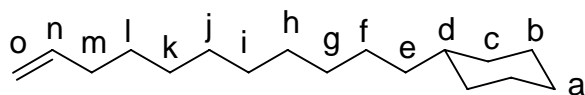

## 2) Polymerization of alkenylcyclohexanes

Typically, to a 25-mL Schlenk flask containing a  $\text{CH}_2\text{Cl}_2$  solution (1.5 mL) of Pd complex **1** (0.010 mmol, 6.6 mg) was added NaBARF (0.012 mmol, 10.6 mg) under Ar. After stirring for several minutes, allylcyclohexane (**I-1**, 0.37 g, 3.0 mmol) was added and the reaction mixture was stirred at room temperature. The polymer precipitates in a few minutes. After 20-min reaction, the reaction mixture was poured into large amount of dichloromethane (ca. 50 mL). A solid formed was collected and dried in vacuo at 25 °C to give poly-**I-1**. (0.32 g, 86% yield,  $M_\text{n}$  = 18000,  $M_\text{w}/M_\text{n}$  = 2.48).  $^1\text{H}$  NMR (500 MHz,  $\text{C}_2\text{D}_2\text{Cl}_4$ ):  $\delta$  1.71 (d, 4H,  $\text{H}_\text{c}$ ), 1.28 (s, 2H,  $\text{H}_\text{b}$ ), 1.15 (s, 6H,  $\text{H}_\text{a}$  and  $\text{H}_\text{d}$ ), 0.88 (s, 4H,  $\text{H}_\text{e}$ ).  $^{13}\text{C}\{^1\text{H}\}$  NMR (125 MHz,  $\text{C}_2\text{D}_2\text{Cl}_4$ ):  $\delta$  38.3 ( $\text{C}_\text{b}$ ), 38.1 ( $\text{C}_\text{a}$ ), 33.8 ( $\text{C}_\text{c}$ ), 24.4 ( $\text{C}_\text{d}$ ).

Other alkenylcyclohexanes are polymerized similarly.

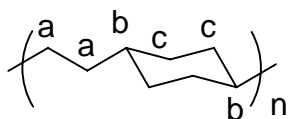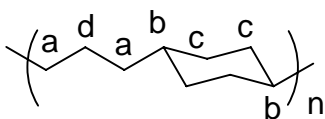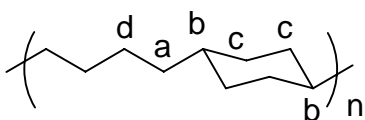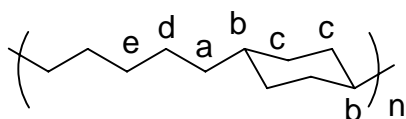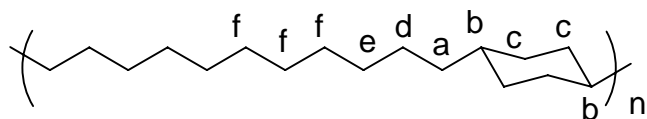

Poly-I-0:  $^{13}\text{C}\{^1\text{H}\}$  NMR (125 MHz,  $\text{C}_2\text{D}_2\text{Cl}_4$ ):  $\delta$  38.6 ( $\text{C}_b$ ), 35.0 ( $\text{C}_a$ ), 33.8 ( $\text{C}_c$ ).

Poly-I-2:  $^{13}\text{C}\{^1\text{H}\}$  NMR (125 MHz,  $\text{C}_2\text{D}_2\text{Cl}_4$ ):  $\delta$  38.3 ( $\text{C}_b$ ), 37.7 ( $\text{C}_a$ ), 33.8 ( $\text{C}_c$ ), 27.5 ( $\text{C}_d$ ).

Poly-I-3:  $^1\text{H}$  NMR (500 MHz,  $\text{C}_2\text{D}_2\text{Cl}_4$ ):  $\delta$  1.71 (d, 4H,  $\text{H}_c$ ), 1.27 and 1.16 (s, 12H,  $\text{H}_a$ ,  $\text{H}_b$ ,  $\text{H}_d$ ,  $\text{H}_e$ ), 0.88 (s, 4H,  $\text{H}_c$ ).  $^{13}\text{C}\{^1\text{H}\}$  NMR (125 MHz,  $\text{C}_2\text{D}_2\text{Cl}_4$ ):  $\delta$  38.3 ( $\text{C}_b$ ), 37.7 ( $\text{C}_a$ ), 33.8 ( $\text{C}_c$ ), 30.6 ( $\text{C}_e$ ), 27.1 ( $\text{C}_d$ ).

Poly-I-9:  $^1\text{H}$  NMR (500 MHz,  $\text{C}_2\text{D}_2\text{Cl}_4$ ):  $\delta$  1.71 (d, 4H,  $\text{H}_c$ ), 1.27 and 1.16 (s, 20H,  $\text{H}_b$ ,  $\text{H}_d$ ,  $\text{H}_e$ ,  $\text{H}_f$ ), 0.88 (s, 4H,  $\text{H}_c$ ).  $^{13}\text{C}\{^1\text{H}\}$  NMR (125 MHz,  $\text{C}_2\text{D}_2\text{Cl}_4$ ):  $\delta$  38.3 ( $\text{C}_b$ ), 37.7 ( $\text{C}_a$ ), 33.9 ( $\text{C}_c$ ), 30.2 ( $\text{C}_e$ ), 29.8 ( $\text{C}_f$ ), 27.0 ( $\text{C}_d$ ).

For kinetic study, the above polymerization was conducted at 0 °C in the presence of naphthalene as inner standard. The portion of the reaction mixture was periodically taken out from the flask and subjected to  $^1\text{H}$  NMR to determine conversion of **I-1**.

## References.

1. van Asselt, R.; Elsevier, C. J.; Smeets, W. J. J.; Spek, A. L.; Benedix, R. *Recl. Trav. Chim. Pays-Bas*. **1994**, *113*, 88.
2. (a) Johnson, L. K.; Killian, C. M.; Brookhart, M.; *J. Am. Chem. Soc.* **1995**, *117*, 6414. (b) Rulke, R. E.; Delis, J. G. P.; Groot, A. M.; Elsevier, C. J.; van Leeuwen, P. W. N. M.; Vrieze, K.; Goubitz, K.; Schenk, H. *J. Organomet. Chem.* **1996**, *508*, 109. (c) Johnson, L. K.; Killian, C. M.; Brookhart, M. *J. Am. Chem. Soc.* **1996**, *118*, 267. (d) Killian, C. M.; Temple, D. J.; Johnson, L. K.; Brookhart, M. *J. Am. Chem. Soc.* **1996**, *118*, 11664.
3. (a) Buschmann, W. E.; Miller, J. S. *Chem. Eur. J.* **1998**, *4*, 1731. (b) Brookhart, M.; Grant, B.; Volpe Jr., A. F. *Organometallics* **1992**, *11*, 3920. (c) Nishida, H.; Takada, N.; Yoshimura, M.; Sonoda, T.; Kobayashi, H. *Bull. Chem. Soc. Jpn.* **1984**, *57*, 2600.

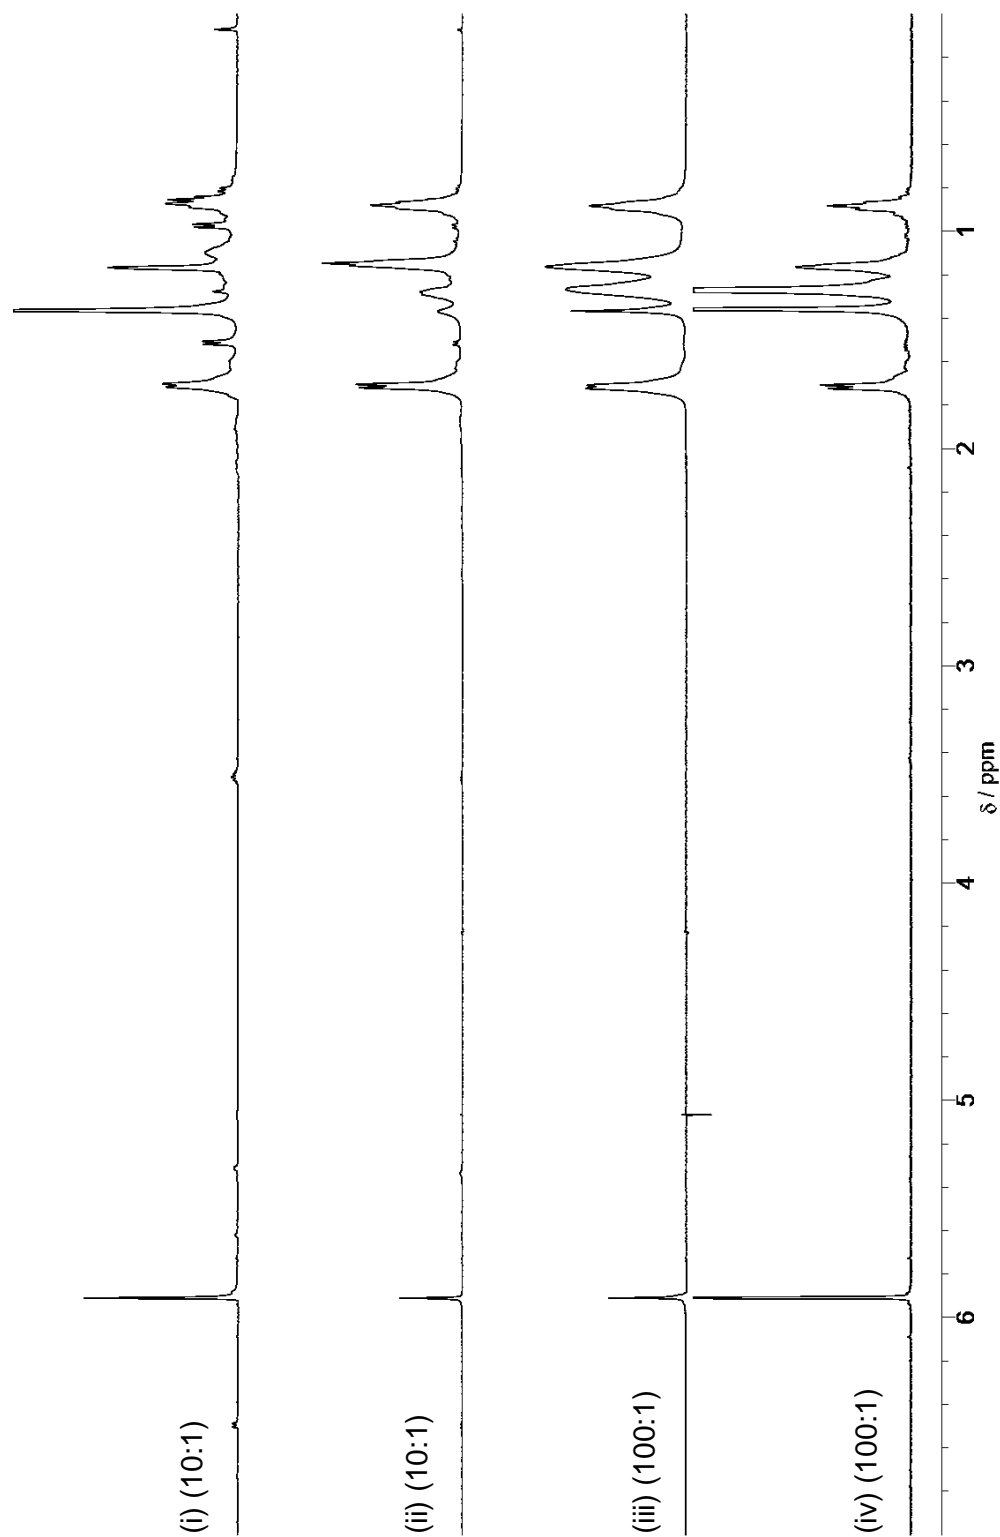

**Figure S-1.**  $^1\text{H}$  NMR spectra ( $\text{C}_2\text{D}_2\text{Cl}_4$  at  $130\text{ }^\circ\text{C}$ ) of (i) poly-I-0, (ii) poly-I-1, (iii) poly-I-3, and (iv) poly-I-9. Ratios in parentheses corresponds to the initial monomer-to-Pd molar ratio of the polymerization reaction.

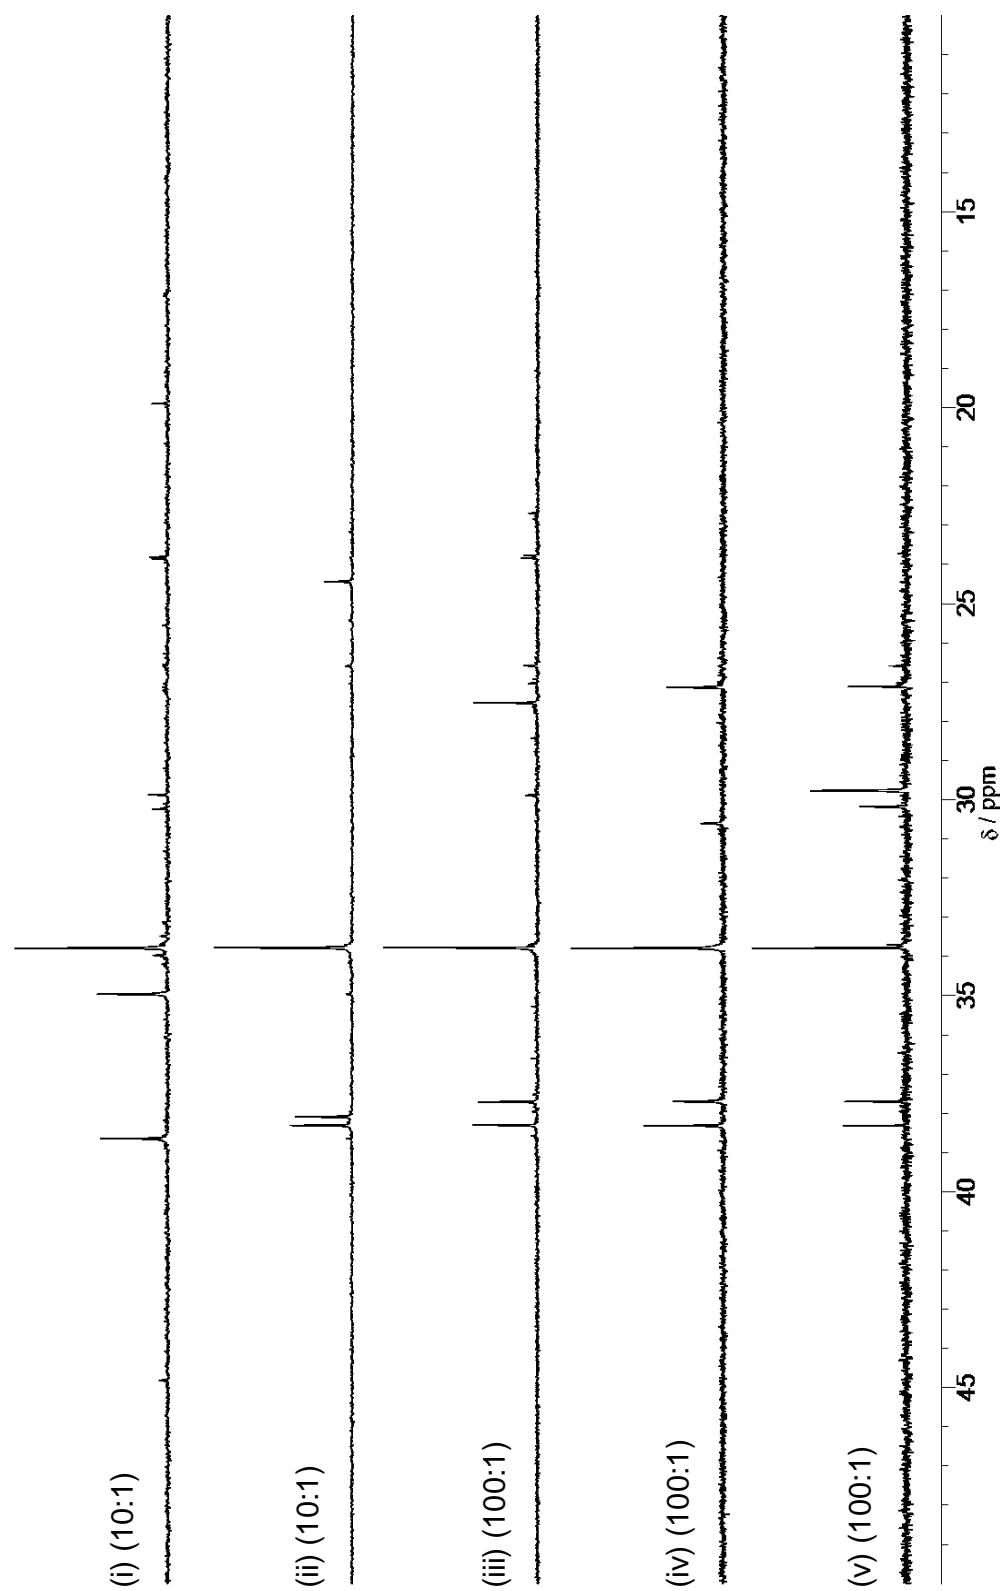

**Figure S-2.**  $^{13}\text{C}\{^1\text{H}\}$  NMR spectra ( $\text{C}_2\text{D}_2\text{Cl}_4$  at  $130\text{ }^\circ\text{C}$ ) of (i) poly-I-0, (ii) poly-I-1, (iii) poly-I-2, (iv) poly-I-3, and (v) poly-I-9. Ratios in parentheses corresponds to the initial monomer-to-Pd molar ratio of the polymerization reaction.

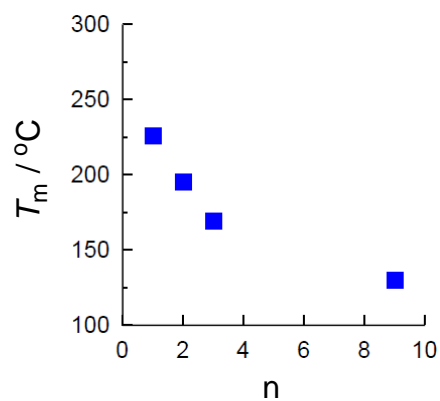

**Figure S-3.** Relationship between length of oligomethylene spacers ( $n$ ) and melting point of poly-**I-n**.

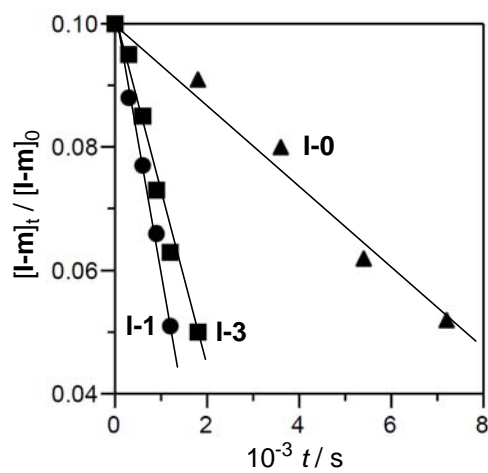

**Figure S-4.** Zeroth-order plots of the polymerization of **I-0** (triangle), **I-1** (circle), and **I-3** (square) by **1/NaBARF** at 0 °C ( $[\mathbf{1}]_0 = 2.0 \text{ mM}$ ,  $[\mathbf{I-m}]_0 = 0.20 \text{ M}$ ).
